# Supplementary material
Source: publisher site journal article supplement (https://www.dovepress.com/article/325043)
Supplement: Supplementary file 1 [file get_supplementary_file.php]

Supplemental Table 1: List of Independent Ethics Committees or Institutional Review

Boards

| **Center number** | **Ethics Committee or Institutional Review Board** | **Department/Institution** |
| --- | --- | --- |
| 1000 | Bellberry Limited | Bellberry Human Research Ethics Committee |
| 1002 | Bellberry Limited | Bellberry Human Research  Ethics Committee |
| 1003 | Bellberry Limited | Bellberry Human Research  Ethics Committee |
| 1004 | Flinders Medical Centre  HREC | Flinders Medical Centre |
| 1200 | Seoul National University Hospital Institutional Review Board |  |
| 1201 | Yonsei University Health System, Severance Hospital, Institutional review board |  |
| 1202 | Samsung Medical Center,  Institutional review board |  |
| 1400 | American University of Beirut Medical Center IRB |  |
| 1401 | Hotel Dieu de France  Hospital IRB |  |
| 1600 | Domain Specific Review  Board | Domain B |
| 2000 | Ethik-Kommission | Medizinische Fakultaet der Eberhard-Karls-Universitaet und am Universitaetsklinikum Tuebingen |
| 2001 | Ethik-Kommission des Landes Berlin | Landesamt fuer Gesundheit und Soziales |
| 2002 | Ethik-Kommission | Landesaerztekammer Thueringen |
| 2003 | Ethik-Kommission | Landesaerztekammer Baden-Wuerttemberg |
| 2004 | Ethik-Kommission | Universitaet Erlangen-Nuernberg Medizinische Fakultaet |
| 2005 | Ethik-Kommission | Landesaerztekammer  Hessen |
| 2006 | Ethik-Kommission des  Landes Berlin | Landesamt fuer Gesundheit  und Soziales |
| 2007 | Ethik-Kommission | Aerztekammer Westfalen-  Lippe und der  Medizinischen Fakultaet der  Westfaelischen Wilhelms-  Universitaet Muenster |
| 2008 | Ethik-Kommission | Landesaerztekammer  Baden-Wuerttemberg |
| 2009 | Ethikkommission der  Ärztekammer Nordrhein |  |
| 2010 | Ethik-Kommission | Universitaet zu Luebeck  Medizinische Fakultaet |
| 2011 | Ethik-Kommission | Aerztekammer Nordrhein |
| 2014 | Ethik-Kommission | Aerztekammer des Saarlandes |
| 2015 | Ethikkommission der Landesärztekammer Bayern |  |
| 2016 | Ethik-Kommission | Technische Universitaet Dresden Medizinische Fakultaet |
| 2018 | Ethik-Kommission | Fakultaet fuer Medizin derb TU Muenchen |
| 2019 | Ethikkommission der Ärztekammer Nordrhein |  |
| 2020 | Ethik-Kommission | Aerztekammern Niedersachsen |
| 2021 | Ethik-Kommission | Aerztekammer Hamburg |
| 2022 | Ethik-Kommission | Bayerische Landesaerztekammer |
| 2025 | Ethik-Kommission | Bayerische Landesaerztekammer |
| 2026 | Ethik-Kommission | Bayerische Landesaerztekammer |
| 2027 | Ethik-Kommission | Aerztekammer Hamburg |
| 2028 | Ethik-Kommission | Aerztekammer Niedersachsen |
| 2029 | Ethik-Kommission | Aerztekammer Nordrhein |
| 2030 | Ethik-Kommission | Aerztekammer Niedersachsen |
| 2200 | Intezeti Etikai Bizottsag |  |
| 2201 | Regionalis es Intezmenyi Kutatasetikai Bizottsag |  |
| 2202 | Kutatasetikai Bizottsag |  |
| 2204 | Tudomanyos es Intezeti Kutatasetikai Bizottsag |  |
| 2205 | Intezeti Etikai Bizottsag |  |
| 2401 | NRES Committee East of England – Cambridge South |  |
| 2403 | East of England – Cambridge South Research Ethics Commitee | National Research and Ethics Service |
| 2600 | Etická komise MOU |  |
| 2601 | Etická komise Nemocnice Na Bulovce |  |
| 2602 | Etická komise Všeobecné fakultní nemocnice v Praze |  |
| 2603 | Etická komise pro multicentrické klinické hodnocení Krajská nemocnice Liberec |  |
| 2604 | Etická komise Fakultní nemocnice Brno |  |
| 2800 | King Hussein Cancer Center Institutional Review Board |  |
| 3000 | CPP Est IV |  |
| 3002 | CPP Est IV |  |
| 3003 | CPP Est IV |  |
| 3006 | CPP Est IV |  |
| 3009 | CPP Est IV |  |
| 3010 | CPP Est IV |  |
| 3013 | CPP Est IV |  |
| 3014 | CPP Est IV |  |
| 3015 | CPP Est IV |  |
| 3016 | CPP Est IV |  |
| 3017 | CPP Est IV |  |
| 3018 | CPP Est IV |  |
| 3019 | CPP Est IV |  |
| 3023 | CPP Est IV |  |
| 3200 | Comite d’ethique hospital facultaire - CHU de Liege |  |
| 3201 | Commissie Medische Ethiek van de UZ Leuven |  |
| 3202 | Ethische Toetsingscommissie van het Jessa Ziekenhuis |  |
| 3203 | Comite d’ethique de la CMSE Namur |  |
| 3204 | Comite d’ethique du GHdC |  |
| 3205 | Ethisch Comite van het OLVZ Aalst |  |
| 3401 | Ethikkommission der Stadt Wien |  |
| 3402 | Ethikkommission der Medizinischen Universitat Wien |  |
| 3404 | Ethikkommission der medizinischen Universitat Innsbruck |  |
| 3600 | Regional komite for medisinsk og helsefaglig forskningsetikk |  |
| 3800 | De Videnskabsetiske Komiteer | De Videnskabsetiske Komiteer for Region Syddanmark Regionshuset Damhaven 12 |
| 3801 | De Videnskabsetiske Komiteer for Region Syddanmark | De Videnskabsetiske Komiteer for Region Syddanmark |
| 3802 | De Videnskabsetiske Komiteer for Region Syddanmark | De Videnskabsetiske Komiteer for Region Syddanmark |
| 3803 | De Videnskabsetiske Komiteer | De Videnskabsetiske Komiteer for Region Syddanmark Regionshuset Damhaven 12 |
| 3804 | De Videnskabsetiske Komiteer for Region Syddanmark | De Videnskabsetiske Komiteer for Region Syddanmark |
| 3805 | De Videnskabsetiske Komiteer | De Videnskabsetiske Komiteer for Region Syddanmark Regionshuset Damhaven 12 |
| 4000 | Comitato Etico | Istituto Clinico Humanitas Via Manzoni, 56 |
| 4002 | COMITATO ETICO DELLA PROVINCIA DI BRESCIA | AO Spedali Civili |
| 4003 | Spettabile Comitato Etico Indipendente | Fondazione IRCCS Istituto Nazionale dei Tumori di Milano Via Venezian Giacomo, 1 |
| 4004 | Spettabile Comitato Catania 2 | c/o AORNAS Garibaldi PiazzaS.M Gesù, 5 |
| 4006 | Spettabile Comitato della ASL LE di Lecce | Via Miglietta, 5 |
| 4007 | Comitato Etico | Istituto Nazioonale per lo Studio e la Cura dei Tumori “Fondazione G. Pascale” Via Mariano Semmola |
| 4008 | Spettabile Comitato per la Sperimentazione Clinica dei Medicinali Area Vasta Nord Ovest | Azienda Ospedaliero Universitaria Pisana di Pisa, Via Roma 67 |
| 4010 | Comitato Etico per le Province di L’Aquila e Teramo | ASL1  Avezzano/Sulmona/L’Aquila via XX Settembre, 27 |
| 4200 | Amphia Academy (AMOA) |  |
| 4201 | PTC |  |
| 4202 | RvB MST |  |
| 4203 | MEC Antonius |  |
| 4204 | Zuyderland Medisch Centrum, locatie Heerlen |  |
| 4205 | ETZ TweeSteden |  |
| 4206 | METC azM/UM |  |
| 4207 | MEC Groningen |  |
| 4208 | BoD Deventer hospital |  |
| 4213 | ACLU |  |
| 4216 | Trial begeleidings commissie |  |
| 4218 | METC Zuidwest Holland |  |
| 4400 | Ethikkommission Nordwest- und Zentralschweiz (EKNZ) |  |
| 4405 | Kantonale Ethikkommission Zürich |  |
| 4406 | Ethikkommission Nordwest- und Zentralschweiz (EKNZ) |  |
| 4600 | Comité Coordinador de Ética de la Investigación Biomédica de Andalucía | Consejería de Salud |
| 4601 | Hospital Univ. Puerta de Hierro Majadahonda | Secretaría Técnica del CEIC |
| 4602 | Agencia de Ensayos Clínicos Servicio de Farmacia | Hospital Clínic de Barcelona |
| 4603 | Ceic Area 1 Fundacion Investigacion Biomedica | Hospital General Gregorio Maranon |
| 4604 | Hospital Universitario la Paz Secretaría Tecnica del Comite Etico de Investigacion Clínica |  |
| 4605 | Comite Coordinador de Etica de la Investigación Biomédica de Andalucía | Consejería de Salud |
| 4606 | Comite Etico De Investigacion CLinica Hospital Universitario De Salamanca |  |
| 4609 | Comite Coordinador de Etica de la Investigacion Biomédica de Andalucía | Consejería de Salud |
| 4610 | Comite Coordinador de Etica de la Investigacion Biomedica de Andalucía | Consejería de Salud |
| 4612 | Comite Etico de Investigacion Clínica | Area 8- Fundacion Hospital de Alcorcón |
| 4613 | Comite Etico de Investigacion Clínica De Galicia | Subdireccion de Farmacia y Productos Sanitarios Conselleria de Sanidade |
| 4614 | CEIC-Concorci Sanitari Integral | Hospital General de l´Hospitalet |
| 4800 | Regionala Etikprovningsnamnden I Stockholm | FE 289 |
| 4801 | Regionala Etikprövningsnamnden I Stockholm | FE 289 |
| 4803 | Regionala Etikprövningsnamnden i  Stockholm | FE 289 |
| 5000 | Penn State Milton S. Hershey Medical Center, Penn State College of Medicine | Human Subjects Protection Office |
| 5001 | Qurom IRB |  |
| 5002 | Qurom IRB |  |
| 5004 | Qurom IRB |  |
| 5005 | Quorum Review, Inc. |  |
| 5007 | NYU School of Medicine IRB |  |
| 5009 | Quorum Review IRB |  |
| 5010 | Quorom IRB |  |
| 5011 | Western Institutional Review Board |  |
| 5012 | Kaiser Permanente Hawaii Institutional Review Board |  |
| 5013 | Quorum Review, Inc. |  |
| 5014 | Quorum Review IRB |  |
| 5016 | Qurom IRB |  |
| 5020 | UCLA Office of the Human Research Protection Program (OHRPP) |  |
| 5026 | Glen Falls Hospital |  |
| 5027 | Quorum |  |
| 5029 | Genesis Healthcare System IRB |  |
| 5031 | Western Institutional Review Board |  |
| 5032 | University of Colorado Health Institutional Review Board |  |
| 5033 | Western Institutional Review Board |  |
| 5034 | Quorum |  |
| 5038 | Quorum Review Inc. (QIRB) |  |
| 5041 | Western Institutional Review Board |  |
| 5042 | Western Institutional Review Board |  |
| 5046 | Quorum Review IRB |  |
| 5051 | Quorum Review IRB |  |
| 6000 | IRB Services |  |
| 6001 | Nova Scotia Health Authority Research Ethics Board |  |
| 6002 | Research Ethics Board of the Vitalité Health Network |  |
| 6004 | OCREB |  |
| 6005 | OCREB |  |
| 6006 | Ontario Cancer Research Ethics Board |  |
| 6007 | UBC BCCA Research Ethics Board (BCCA REB) Fairmont Medical Building |  |
| 6008 | UBC BCCA Research Ethics Board (BCCA REB) Fairmont Medical Building |  |
| 6009 | UBC BCCA Research Ethics Board |  |
| 6010 | Comite d'ethique de la recherche du Centre de Santé et de Services  Sociaux de Trois-Rivières |  |
| 6011 | Comite d'ethique de la recherche du Centre de Santé et de Services  Sociaux de Trois-Rivières |  |
| 6012 | Comite d’Ethique de la Recherche du CIUSSS de l’Estrie – CHUS |  |
| 6600 | Comite de Etica e Investigaciones |  |
| 6601 | Comite de etica en Investigación Clínica |  |
| 6802 | Oaxaca Site Management Organization, S.C. | Oaxaca Site Management Organization, S.C. |
| 8201 | Ethics Committee for Multicenter Trials |  |
| 8202 | Ethics Committee for Multicenter Trials |  |
| 8204 | Ethics Committee for Multicenter Trials |  |
| 8600 | Medical Research and Ethics Committee | Medical Research and Ethics Committee |
| 8601 | Medical Research Ethics Committee (MREC) |  |
| 8801 | Komisja Bioetyczna przy Okregowej Izbie Lekarskiej |  |
| 8804 | Komisja Bioetyczna przy Okregowej Izbie Lekarskiej |  |
| 9000 | Comissão de Ética para a Investigação Clínica (CEIC) |  |
| 9001 | Comissão de Ética para a Investigação Clínica (CEIC) |  |
| 9200 | Ethic committee under Arkhangelsk clinical oncology dispensary |  |
| 9204 | Independent Ethic Committee | Tambov regional clinical oncology dispensary |
| 9400 | Institutional Review Board | Faculty of Medicine,  Chulalongkorn University |
| 9401 | Central Research Ethics Committee |  |
| 9600 | Istanbul University Cerrahpaşa Medical Faculty Clinical Research Ethics Committee | Clinical Research |
| 9602 | Istanbul University Cerrahpaşa Medical Faculty Clinical Research Ethics Committee | Clinical Research |
| 9603 | Istanbul University Cerrahpaşa Medical Faculty Clinical Research Ethics Committee | Clinical Research |
| 9604 | Istanbul University Cerrahpaşa Medical Faculty Clinical Research Ethics Committee | Clinical Research |
